# Supplementary material for: Differential Ability of S Protein of SARS-CoV-2 Variants to Downregulate ACE2
Source: Preprints.org preprint supplement (doi:10.20944/preprints202312.1139.v1), 2023-12-15
Supplement: Supplementary file 1 [file supplementary]

**Supplementary Figures**

Fig. S1
